# Supplementary material for: The Effect of Non-Overlapping Somatic Mutations in BRAF, NRAS, NF1, or CKIT on the Incidence and Outcome of Brain Metastases during Immune Checkpoint Inhibitor Therapy of Metastatic Melanoma
Source: MDPI journal article supplement (doi:10.3390/cancers16030594), 2024-01-30
Supplement: s1 [file s1]

Supplemental table S1: Patient demographics

| UPN | Mut                 | Age | Sex | Race | Primary site | Site of metastases                             | Stage | Initial LDH | TMB (per Mb) | PDL1  | Brain mets |
|-----|---------------------|-----|-----|------|--------------|------------------------------------------------|-------|-------------|--------------|-------|------------|
| 1   | T599 V600insT       | 55  | M   | C    | extr         | LN, lung                                       | IVB   | 172         |              |       | yes-d      |
| 2   | BRAF-NF2 fusion     | 53  | F   | C    | UNK          | LN, adrenal                                    | IVC   | 115         | 6            | 6     | yes-d      |
| 3   | BRAF deletion       | 66  | M   | C    | extr         | bone                                           | IVC   | 162         | 5            | 5     | N          |
| 4   | CCDC127-BRAF fusion | 64  | M   | C    | trunk        | LN, liver, spleen, bone                        | IVC   | 190         |              |       | N          |
| 5   | exon 8 rearrang     | 66  | F   | C    | scalp        | abd, bone                                      | IVC   | 187         | 5            | 5     | N          |
| 6   | BRAF V600E          | 53  | M   | C    | trunk        | LN, SQ, brain                                  | IVD   | 286         | 8            | 8     | yes-o      |
| 7   | BRAF V600E          | 45  | M   | C    | UNK          | brain                                          | IVD   | 799         | 13           | 13    | yes-o      |
| 8   | BRAF V600E          | 59  | F   | C    | extr         | brain, LN, abd                                 | IVD   | 394         | 6            | 6     | yes-o      |
| 9   | BRAF V600E          | 70  | F   | C    | UNK          | brain                                          | IVD   | 203         | 5            | 5     | yes-o      |
| 10  | BRAF V600K          | 52  | F   | C    | trunk        | LN, brain                                      | IVD   | 164         | 19           | 19    | yes-o      |
| 11  | BRAF V600K          | 72  | F   | C    | trunk        | LN, brain                                      | IVD   | 226         | 11           | 11    | yes-o      |
| 12  | BRAF V600R          | 62  | F   | C    | UNK          | LN, brain                                      | IVD   | 276         | 11           | 11    | yes-o      |
| 13  | BRAF V600E          | 34  | M   | C    | neck         | SQ, liver, spleen lung, brain                  | IVD   | 251         | 24           | 24    | yes-o      |
| 14  | BRAF V600E          | 43  | F   | C    | trunk        | adrenal, lung                                  | IVC   | 223         | 6            | 6     | yes-d      |
| 15  | BRAF V600E          | 26  | M   | C    | trunk        | LN, adrenal, bone                              | IVC   | 216         | 5            | 5     | N          |
| 16  | BRAF V600E          | 50  | F   | C    | trunk        | LN (unresectable)                              | IIIB  | 161         | 10           | 10    | N          |
| 17  | BRAF V600E          | 59  | M   | C    | trunk        | lung, bone                                     | IVC   | 254         | 3            | 3     | N          |
| 18  | BRAF V600E          | 48  | F   | C    | trunk        | LN                                             | IVA   | 163         | 3            | 3     | N          |
| 19  | BRAF V600E          | 51  | F   | C    | extr         | LN, lung                                       | IVB   | 220         | indet        | indet | N          |
| 20  | BRAF V600E          | 59  | M   | C    | trunk        | LN                                             | IVA   | 167         |              |       | N          |
| 21  | BRAF V600E          | 48  | M   | C    | extr         | SQ                                             | IVA   | 184         | 8            | 8     | N          |
| 22  | BRAF V600E          | 56  | M   | C    | trunk        | SQ, abd, bone                                  | IVC   | 221         | 9            | 9     | N          |
| 23  | BRAF V600E          | 87  | M   | C    | trunk        | SQ, liver, LN, bone                            | IVC   | 359         | 14           | 14    | N          |
| 24  | BRAF V600E          | 66  | F   | C    | extr         | LN, SQ                                         | IVA   | 196         | 8            | 8     | N          |
| 25  | BRAF V600E          | 36  | M   | C    | scalp        | LN, SQ                                         | IVA   | 171         | 1            | 1     | N          |
| 26  | BRAF V600E          | 63  | F   | C    | trunk        | mucosal, lung                                  | IVC   | 172         | 11           | 11    | N          |
| 27  | BRAF V600E          | 35  | F   | C    | trunk        | SQ                                             | IVA   | 160         | 14           | 14    | N          |
| 28  | BRAF V600E          | 79  | F   | C    | extr         | SQ, liver                                      | IVC   | 189         | 5            | 5     | N          |
| 29  | BRAF V600E          | 52  | F   | C    | trunk        | LN                                             | IVA   | 109         | 78           | 78    | N          |
| 30  | BRAF V600E          | 68  | F   | C    | face         | SQ, lung                                       | IVB   | 184         |              |       | N          |
| 31  | BRAF V600K          | 75  | M   | C    | face         | SQ                                             | IVA   | 133         | 44           | 44    | N          |
| 32  | BRAF V600K          | 68  | M   | C    | trunk        | SQ, lung                                       | IVB   | 201         | 50           | 50    | N          |
| 33  | BRAF V600K          | 55  | M   | C    | ear          | SQ, LN                                         | IVA   | 189         | 32           | 32    | N          |
| 34  | CKIT A829P          | 72  | M   | C    | trunk        | SQ, lung                                       | IVB   | 163         | >10          | >10   | yes-d      |
| 35  | NF1                 | 77  | M   | C    | scalp        | lung, liver, bone, brain                       | IVD   | 463         | 82           | 82    | yes-o      |
| 36  | NF1                 | 67  | M   | C    | trunk        | liver, brain                                   | IVD   | 312         | 79           | 79    | yes-o      |
| 37  | NF1                 | 69  | M   | C    | UNK          | brain, lung SQ                                 | IVD   | 236         | n/a          | n/a   | yes-o      |
| 38  | NF1                 | 59  | M   | C    | trunk        | lung, bone                                     | IVC   | 120         | n/a          | n/a   | yes-d      |
| 39  | NF1                 | 48  | M   | C    | face         | lung                                           | IVB   | 196         | 139          | 139   | N          |
| 40  | NF1                 | 83  | M   | C    | trunk        | SQ, lung                                       | IVB   | 228         |              |       | N          |
| 41  | NF1                 | 84  | M   | C    | trunk        | lung, peritoneal, bone, renal, adrenal, pleura | IVC   | 1024        | 61           | 61    | N          |
| 42  | NF1                 | 100 | F   | C    | neck         | LN, SQ                                         | IVA   | 217         | 34           | 34    | N          |
| 43  | NF1                 | 79  | M   | C    | UNK          | pancreas                                       | IVC   | 281         | 106          | 106   | N          |
| 44  | NF1                 | 75  | M   | C    | scalp        | liver, brain                                   | IVC   | 153         | 47           | 47    | N          |
| 45  | NF1                 | 99  | M   | C    | scalp        | SQ, lung, bone                                 | IVC   | 154         | 6            | 6     | N          |
| 46  | NF1                 | 75  | F   | C    | UNK          | lung                                           | IVB   | 364         | 155          | 155   | N          |
| 47  | NF1                 | 68  | F   | C    | trunk        | LN, SQ                                         | IVA   | 297         | 54           | 54    | N          |
| 48  | NF1                 | 71  | M   | C    | face         | LN, SQ                                         | IVA   | 145         | 34           | 34    | N          |
| 49  | NF1                 | 71  | M   | C    | scalp        | LN                                             | IVA   | 154         | 73           | 73    | N          |
| 50  | NF1                 | 48  | M   | C    | face         | SQ, LN                                         | IVA   | 214         | 5            | 5     | N          |

|    |                 |    |   |   |       |                   |     |     |       |       |       |
|----|-----------------|----|---|---|-------|-------------------|-----|-----|-------|-------|-------|
| 51 | NF1             | 53 | F | C | extr  | SQ, LN            | IVA | 268 | 0     | 0     | N     |
| 52 | NF1             | 86 | M | C | scalp | lung              | IVB | 176 | 78    | 78    | N     |
| 53 | NF1             | 79 | M | C | scalp | SQ                | IVA | 215 | 154   | 154   | N     |
| 54 | NF1             | 75 | M | C | trunk | bone              | IVC | 213 |       |       | N     |
| 55 | NF1             | 81 | M | C | trunk | LN, SQ, lung      | IVB | 166 | 52    | 52    | N     |
| 56 | NF1             | 77 | M | C | face  | SQ                | IVA | 269 | 82    | 82    | N     |
| 57 | NF1             | 64 | M | C | extr  | SQ, lung          | IVB | 216 | 49    | 49    | N     |
| 58 | NRAS Q61R       | 63 | F | C | trunk | LN, liver, lung   | IVC | 298 | 11    | 11    | yes-d |
| 59 | NRAS Q61R       | 51 | M | C | trunk | SQ                | IVA | 127 | 8     | 8     | N     |
| 60 | NRAS Q61K       | 49 | M | C | extr  | SQ                | IVA | 191 | 57    | 57    | N     |
| 61 | NRAS Q61K       | 32 | M | C | UNK   | LN, lung          | IVB | 239 | 13    | 13    | N     |
| 62 | NRAS Q61K       | 79 | M | C | UNK   | LN                | IVA | 499 | 18    | 18    | N     |
| 63 | NRAS Q61K       | 69 | M | C | trunk | abd               | IVC | 180 | 4     | 4     | N     |
| 64 | NRAS Q61K       | 66 | M | C | trunk | LN, lung          | IVB | 154 | 25    | 25    | N     |
| 65 | NRAS Q61L       | 57 | M | C | UNK   | SQ, muscle        | IVA | 171 | 32    | 32    | N     |
| 66 | NRAS Q61L       | 68 | M | C | extr  | SQ                | IVA | 133 | 39    | 39    | N     |
| 67 | NRAS Q61R       | 48 | F | C | extr  | SQ, renal, lung   | IVC | 131 | n/a   | n/a   | N     |
| 68 | NRAS Q61R       | 65 | M | C | trunk | LN                | IVA | 184 | 15    | 15    | N     |
| 69 | NRAS Q61R       | 67 | M | C | trunk | LN, pleura        | IVB | 205 | 21    | 21    | N     |
| 70 | NRAS Q61R       | 71 | M | C | UNK   | LN, spleen, liver | IVC | 141 | indet | indet | N     |
| 71 | NRAS Q61R       | 41 | M | C | extr  | LN, SQ            | IVA | 167 |       |       | N     |
| 72 | NRAS G12D, T50I | 72 | M | C | trunk | LN                | IVA | 171 | 81    | 81    | N     |
| 73 | QN              | 70 | M | C | scalp | lung              | IVB | 305 | 88    | 88    | N     |
| 74 | QN              | 56 | M | H | extr  | liver, bone       | IVC | 187 | 2     | 2     | N     |
| 75 | QN              | 63 | M | C | scalp | lung, LN          | IVB | 191 | 16    | 16    | N     |
| 76 | QN              | 63 | M | C | trunk | LN, ascites       | IVC | 160 | 4     | 4     | N     |
| 77 | QN              | 75 | F | C | extr  | LN, SQ            | IVA | 202 | 24    | 24    | N     |
| 78 | QN              | 57 | M | C | extr  | LN, bone          | IVC | 286 | 11    | 11    | N     |
| 79 | QN              | 60 | M | C | trunk | lung              | IVB | 193 | indet | indet | N     |
| 80 | QN              | 42 | M | C | extr  | LN,SQ             | IVA | NA  | 1     | 1     | N     |
| 81 | QN              | 51 | F | C | trunk | LN                | IVA | 293 | 9     | 9     | N     |
| 82 | QN              | 76 | F | A | extr  | LN                | IVA | 181 | 1     | 1     | N     |
| 83 | QN              | 80 | M | C | extr  | lung, LN          | IVB | 142 |       |       | N     |
| 84 | QN              | 76 | F | C | neck  | lung              | IVB | 181 |       |       | N     |
| 85 | QN              | 44 | M | C | ear   | LN, liver, lung   | IVC | 240 | 19    | 19    | N     |

UPN, unique patient number; QN, "quadruple negative" (no BRAF, NRAS, CKIT or NF1 mutations identified); F, female; M, male; C, Caucasian; H, Hispanic; A, Asian; extr, extremity; UNK, unknown primary; SQ, subcutaneous; LN, lymph node; abd, abdomen; yes-d; delayed onset of brain metastases; yes-o, brain metastases at diagnosis of metastatic disease; N, no brain metastases.
