# Supplementary material for: The Effect of Non-Overlapping Somatic Mutations in BRAF, NRAS, NF1, or CKIT on the Incidence and Outcome of Brain Metastases during Immune Checkpoint Inhibitor Therapy of Metastatic Melanoma
Source: MDPI journal article supplement (doi:10.3390/cancers16030594), 2024-01-30
Supplement: s1 [file s1]

**Supplemental table S2: Treatment outcomes**

| UPN | Mutation            | Initial ICI regimen | ICI doses | PFS (mo) | TT added | Brain mets | CNS RT | OS (mo) | CKI toxicity                                             | Current status |
|-----|---------------------|---------------------|-----------|----------|----------|------------|--------|---------|----------------------------------------------------------|----------------|
| 1   | T599 V600insT       | nivo                | 7         | 4.3      | DT, EB   | yes-d      | NT     | 14.1    | immune nephritis                                         | DOD            |
| 2   | BRAF-NF2 fusion     | ipi                 | 25        | 6.0      | DT       | yes-d      | NT     | 57.3    | hypothyroidism                                           | DOD            |
| 3   | BRAF deletion       | pembro              | 8         | 19.0     |          | N          |        | 22.1    | hypothyroidism                                           | DOD            |
| 4   | CCDC127-BRAF fusion | nivo                | 12        | 4.1      |          | N          |        | 8.5     | diarrhea                                                 | DOD            |
| 5   | exon 8 rearrang     | ipi+nivo            | 8         | 30.2     | DT       | N          |        | 50.8    |                                                          | DOD            |
| 6   | BRAF V600E          | ipi+nivo            | 9         | 2.5      | EB       | yes-o      | WBRT   | 9.8     |                                                          | DOD            |
| 7   | BRAF V600E          | ipi                 | 8         | 21.1     | EB       | yes-o      | NT     | 116.0   | diarrhea                                                 | NED            |
| 8   | BRAF V600E          | ipi+nivo            | 6         | 9.1      |          | yes-o      | SRS    | 10.0    | rash, colitis, encephalopathy                            | NED            |
| 9   | BRAF V600E          | ipi+nivo            | 11        | 10.9     |          | yes-o      | SRS    | 10.9    | rash,                                                    | NED            |
| 10  | BRAF V600K          | ipi+nivo            | 10        | 9.6      |          | yes-o      | SRS    | 22.3    | hypothyroidism                                           | NED            |
| 11  | BRAF V600K          | ipi+nivo            | 6         | 7.9      |          | yes-o      | NT     | 9.7     | rash, colitis, ankle swelling, fatigue, hypopituitarism  | NED            |
| 12  | BRAF V600R          | nivo                | 7         | 7.1      |          | yes-o      | WBRT   | 7.8     | pneumonitis                                              | DOD            |
| 13  | BRAF V600E          | nivo                | 12        | 27.6     | EB       | yes-o      | WBRT   | 35.5    |                                                          | DOD            |
| 14  | BRAF V600E          | ipi+nivo            | 7         | 6.7      | EB       | yes-d      | SRS    | 17.4    | fevers                                                   | DOD            |
| 15  | BRAF V600E          | ipi+nivo            | 13        | 29.7     | B        | N          |        | 47.1    | Fever, diarrhea                                          | NED            |
| 16  | BRAF V600E          | nivo                | 8         | 1.8      | DT, EB   | N          |        | 43.5    | skin rash                                                | NED            |
| 17  | BRAF V600E          | ipi+nivo            | 16        | 27.8     |          | N          |        | 39.9    |                                                          | DOD            |
| 18  | BRAF V600E          | nivo                | 12        | 25.4     | DT       | N          |        | 37.1    | hypothyroidism                                           | NED            |
| 19  | BRAF V600E          | nivo                | 9         | 42.2     |          | N          |        | 42.5    | rash, hypothyroidism                                     | NED            |
| 20  | BRAF V600E          | ipi                 | 6         | 8.5      | Vem, D   | N          |        | 24.2    | colitis                                                  | DOD            |
| 21  | BRAF V600E          | ipi+nivo            | 4         | 16.2     |          | N          |        | 26.7    | hypopituitarism, uveitis                                 | NED            |
| 22  | BRAF V600E          | ipi+nivo            | 8         | 11.1     |          | N          |        | 15.6    | CIDP                                                     | NED            |
| 23  | BRAF V600E          | ipi+nivo            | 3         | 2.0      |          | N          |        | 2.3     |                                                          | DOD            |
| 24  | BRAF V600E          | ipi+nivo            | 8         | 10.0     |          | N          |        | 22.3    | rash, hepatitis, hypothyroid, dry eyes and mouth         | NED            |
| 25  | BRAF V600E          | ipi+nivo            | 5         | 1.5      | EB       | N          |        | 21.6    |                                                          | NED            |
| 26  | BRAF V600E          | ipi+nivo            | 4         | 9.3      |          | N          |        | 21.4    | encephalopathy, hypothyroid, rash                        | DOD            |
| 27  | BRAF V600E          | ipi+nivo            | 2         | 9.8      |          | N          |        | 22.5    | colitis, pneumonitis                                     | Ongoing        |
| 28  | BRAF V600E          | nivo                | 3         |          |          | N          |        | 3.0     | AKI                                                      | Died other     |
| 29  | BRAF V600E          | ipi+nivo            | 13        | 11.2     |          | N          |        | 12.1    | abdominal cramps, N/V                                    | NED            |
| 30  | BRAF V600E          | ipi+nivo            | 3         | 2.3      |          | N          |        | 10.1    |                                                          | NED            |
| 31  | BRAF V600K          | nivo                | 12        | 24.9     |          | N          |        | 36.5    |                                                          | NED            |
| 32  | BRAF V600K          | ipi+nivo            | 7         | 33.6     |          | N          |        | 41.5    | hypopituitarism, rash                                    | NED            |
| 33  | BRAF V600K          | ipi+nivo            | 7         | 34.3     |          | N          |        | 41.3    | hypopituitarism                                          | NED            |
| 34  | CKIT A829P          | ipi+nivo            | 17        | 7.3      | nilot    | yes-d      | WBRT   | 6.2     | hot flash, fatigue, colitis, fever, rash, hypothyroidism | DOD            |
| 35  | NF1                 | ipi+nivo            | 4         | 2.0      |          | yes-o      | NT     | 2.5     | diarrhea, rash                                           | DOD            |
| 36  | NF1                 | ipi+nivo            | 3         | 1.8      | T        | yes-o      | SRS    | 2.7     | hypothyroid                                              | DOD            |
| 37  | NF1                 | pembro              | 5         | 5.7      |          | yes-o      | WBRT   | 7.9     | uveitis                                                  | DOD            |
| 38  | NF1                 | ipi+nivo            | 4         | 3.2      |          | yes-d      | NT     | 5.3     | colitis                                                  | DOD            |
| 39  | NF1                 | ipi+nivo            | 11        | 35.5     |          | N          |        | 46.7    | fevers                                                   | NED            |
| 40  | NF1                 | nivo                | 7         | 12.4     |          | N          |        | 12.4    |                                                          | NED            |
| 41  | NF1                 | ipi+nivo            | 1         | 1.0      |          | N          |        | 1.2     |                                                          | DOD            |
| 42  | NF1                 | nivo                | 3         | 39.5     |          | N          |        | 47.7    |                                                          | Died other     |
| 43  | NF1                 | ipi+nivo            | 10        | 14.6     |          | N          |        | 26.6    |                                                          | NED            |
| 44  | NF1                 | nivo                | 26        | 47.4     | Su       | N          |        | 59.7    |                                                          | NED            |
| 45  | NF1                 | nivo                | 12        | 2.3      | T, B     | N          |        | 11.1    |                                                          | DOD            |
| 46  | NF1                 | pembro              | 9         | 42.4     |          | N          | SRS    | 51.5    | hypothyroidism                                           | NED            |
| 47  | NF1                 | nivo                | 16        | 3.9      | T        | N          |        | 45.2    |                                                          | NED            |
| 48  | NF1                 | nivo                | 10        | 8.3      |          | N          |        | 9.3     |                                                          | Died other     |
| 49  | NF1                 | nivo                | 12        | 40.7     |          | N          |        | 52.8    | colitis                                                  | NED            |
| 50  | NF1                 | ipi+nivo            | 9         | 13.4     | T        | N          |        | 45.3    | cutaneous granulomas; flank pain, dizziness              | NED            |
| 51  | NF1                 | nivo                | 7         | 3.0      |          | N          |        | 23.1    | hypothyroidism                                           | DOD            |

|    |                 |          |    |      |      |       |    |      |                                                        |            |
|----|-----------------|----------|----|------|------|-------|----|------|--------------------------------------------------------|------------|
| 52 | NF1             | nivo     | 9  | 9.2  | T    | N     |    | 23.0 |                                                        | NED        |
| 53 | NF1             | ipi+nivo | 4  | 8.7  |      | N     |    | 17.2 | rash                                                   | NED        |
| 54 | NF1             | ipi+nivo | 6  | 41.3 |      | N     |    | 41.6 | colitis, back pain,                                    | DOD        |
| 55 | NF1             | pembro   | 13 | 34.6 |      | N     |    | 23.0 | hypothyroidism                                         | NED        |
| 56 | NF1             | nivo     | 15 | 17.9 | T    | N     |    | 58.1 |                                                        | NED        |
| 57 | NF1             | nivo     | 3  | 1.9  |      | N     |    | 57.4 | colitis, peripheral neuropathy                         | NED        |
| 58 | NRAS Q61R       | ipi+nivo | 7  | 2.9  |      | yes-d | NT | 8.5  | rash, hypophysitis, diarrhea                           | DOD        |
| 59 | NRAS Q61R       | ipi+nivo | 16 | 14.5 | T, B | N     |    | 27.0 | colitis, arthritis                                     | DOD        |
| 60 | NRAS Q61K       | ipi+nivo | 10 | 19.6 |      | N     |    | 35.2 |                                                        | NED        |
| 61 | NRAS Q61K       | ipi+nivo | 11 | 4.7  | T    | N     |    | 29.5 | colitis                                                | DOD        |
| 62 | NRAS Q61K       | nivo     | 7  | 13.0 |      | N     |    | 24.5 |                                                        | NED        |
| 63 | NRAS Q61K       | ipi+nivo | 7  | 4.2  | B    | N     |    | 17.6 |                                                        | DOD        |
| 64 | NRAS Q61K       | ipi+nivo | 9  | 11.3 |      | N     |    | 13.6 | colitis, sinus infection, renal stones, anemia,        | Ongoing    |
| 65 | NRAS Q61L       | ipi+nivo | 11 | 38.2 |      | N     |    | 45.4 | colitis, hyperthyroidism                               | NED        |
| 66 | NRAS Q61L       | nivo     | 9  | 21.0 |      | N     |    | 23.0 | fatigue, arthralgia                                    | NED        |
| 67 | NRAS Q61R       | pembro   | 5  | 11.4 | T    | N     |    | 27.4 | diarrhea, rash, hypopituitarism                        | DOD        |
| 68 | NRAS Q61R       | ipi+nivo | 2  | 24.9 |      | N     |    | 25.5 | rash, colitis, worsening RA                            | NED        |
| 69 | NRAS Q61R       | pembro   | 30 | 9.9  | T    | N     |    | 23.6 | colitis                                                | DOD        |
| 70 | NRAS Q61R       | nivo     | 10 | 9.9  |      | N     |    | 21.5 |                                                        | NED        |
| 71 | NRAS Q61R       | ipi+nivo | 7  | 8.6  |      | N     |    | 8.6  |                                                        | NED        |
| 72 | NRAS G12D, T50I | nivo     | 3  | 32.4 | T    | N     |    | 44.4 |                                                        | NED        |
| 73 | QN              | ipi+nivo | 10 | 10.2 |      | N     |    | 21.8 | rash, hypothyroidism                                   | NED        |
| 74 | QN              | ipi+nivo | 12 | 39.9 | T    | N     |    | 39.9 |                                                        | DOD        |
| 75 | QN              | nivo     | 5  | 7.4  |      | N     |    | 11.8 | colitis                                                | DOD        |
| 76 | QN              | ipi+nivo | 11 | 3.0  |      | N     |    | 32.3 |                                                        | NED        |
| 77 | QN              | ipi+nivo | 6  | 23.6 |      | N     |    | 24.0 | rash, arthritis, psoriasis, pruritis, ILD              | Died other |
| 78 | QN              | ipi+nivo | 8  | 11.0 | T, B | N     |    | 11.2 | hypothyroidism, rash, pruritis, fever, SOB, diarrhea   | DOD        |
| 79 | QN              | ipi+nivo | 4  | 1.9  |      | N     |    | 2.3  | hematuria                                              | NED        |
| 80 | QN              | pembro   | 42 | 52.2 |      | N     |    | 63.9 |                                                        | NED        |
| 81 | QN              | ipi+nivo | 7  | 19.2 |      | N     |    | 19.2 | rash, colitis, hepatitis, myopathy, neuropathy, nausea | DOD        |
| 82 | QN              | ipi+nivo | 3  | 6.3  |      | N     |    | 6.4  | elevated liver enzymes, rash, psoriasis                | DOD        |
| 83 | QN              | nivo     | 6  | 7.6  |      | N     |    | 7.8  | rash, bullous pemphigoid, dizziness, nephritis, SOB    | DOD        |
| 84 | QN              | ipi+nivo | 16 | 13.3 |      | N     |    | 14.6 | headache, inflammatory colitis,                        | Died other |
| 85 | QN              | ipi+nivo | 7  | 7.8  |      | N     |    | 7.8  |                                                        | NED        |

UPN, unique patient number; QN, “quadruple negative (no BRAF, NRAS, NF1 or CKIT mutations); nivo, nivolumab; ipi, ipilimumab; pembro, pembrolizumab; ipi+nivo, combined ipilimumab plus nivolumab; D, dabrafenib; T, trametinib; E, encorafenib; B, binimetinib; vem, vemurafenib; nilot, nilotinib; Su, sunitinib; yes-d; delayed onset of brain metastases; yes-o, brain metastases at diagnosis of metastatic disease; N, no brain metastases; NT, not treated; WBRT, whole brain radiotherapy; SRS, stereotactic radiosurgery; CIDP, chronic immune demyelinating polyneuropathy; AKI, acute kidney injury; N/V, nausea and vomiting; RA, rheumatoid arthritis; ILD, interstitial lung disease; SOB, short of breath, DOD, died of disease; NED, no evidence of disease; Died other, died of non-cancer related causes.
